# Supplementary material
Source: PubMed Central journal article supplement (PMC6777230)

## Supplementary Online Content

Sparano JA., Gray RJ, Makower DF, et al. Clinical Outcomes in Early Breast Cancer with a High 21-Gene Recurrence Score of 26-100 Assigned to Adjuvant Chemotherapy plus Endocrine Therapy: A Secondary Analysis of the Prospective TAILORx Trial. JAMA Oncology 2019

eTable 1. Chemotherapy regimens

eTable 2. Number and type of events

eTable 3. Nine-year event rates

eFigure 1. Duration of followup by treatment arm

**eTable 1. Chemotherapy regimens**

| Regimen Name                      | Regimen Dose/Schedule                                                                                                                                   | Regimen Schedule         | No. of Cycles            |
|-----------------------------------|---------------------------------------------------------------------------------------------------------------------------------------------------------|--------------------------|--------------------------|
| Oral CMF                          | C 100 mg/m <sup>2</sup> /day PO x 14 days<br>M 40 mg/m <sup>2</sup> IV days 1, 8<br>F 600 mg/m <sup>2</sup> IV days 1, 8                                | Every 4 weeks            | 6                        |
| IV CMF                            | C 600 mg/m <sup>2</sup> IV<br>M 40 mg/m <sup>2</sup> IV<br>F 600 mg/m <sup>2</sup> IV                                                                   | Every 3 weeks            | 6-8                      |
| Standard AC                       | A 60 mg/m <sup>2</sup> IV<br>C 600 mg/m <sup>2</sup> IV                                                                                                 | Every 3 weeks            | 4                        |
| Dose dense AC                     | A 60 mg/m <sup>2</sup> IV<br>C 600 mg/m <sup>2</sup> IV<br>Plus G-CSF                                                                                   | Every 2 weeks            | 4                        |
| Standard AC - T                   | A 60 mg/m <sup>2</sup> and C 600 mg/m <sup>2</sup> IV every 3 weeks x 4 cycles ⇒ T 175 mg/m <sup>2</sup> every 3 weeks x 4 cycles                       | Every 3 weeks            | 8                        |
| Dose dense AC - T                 | A 60 mg/m <sup>2</sup> and C 600 mg/m <sup>2</sup> IV plus G-CSF every 2 weeks x 4 cycles ⇒ T 175 mg/m <sup>2</sup> plus G-CSF every 2 weeks x 4 cycles | Every 2 weeks            | 8                        |
| FEC                               | F – 500 mg/m <sup>2</sup> IV<br>E – 50-100 mg/m <sup>2</sup> IV<br>C – 500 mg/m <sup>2</sup> IV                                                         | Every 3 weeks            | 6                        |
| TAC                               | T - 75 mg/m <sup>2</sup><br>A - 50 mg/m <sup>2</sup><br>C - 500 mg/m <sup>2</sup><br><b>NOTE:</b> TAC should be used only in women ≤ 70 years of age    | Every 3 weeks            | 4-6                      |
| TC                                | T - 75 mg/m <sup>2</sup><br>C - 600 mg/m <sup>2</sup>                                                                                                   | Every 3 weeks            | 4                        |
| Other protocol-specified regimens | Participating in other CTSU trials including chemotherapy                                                                                               | As specified in protocol | As specified in protocol |

**eTable 2. Number and type of events in the RS 26-100 cohort at the time of analysis.**

**Entire followup period**

| Study Arm                    | Taxane & Cyclophosphamide | Anthracycline without Taxane | Anthracycline and Taxane | CMF | Other | No chemo therapy | All patients |
|------------------------------|---------------------------|------------------------------|--------------------------|-----|-------|------------------|--------------|
| Number                       | 589                       | 334                          | 244                      | 52  | 81    | 89               | 1389         |
| IBTR                         | 12                        | 5                            | 1                        | 2   | 0     | 4                | 24           |
| Other LR +/- IBTR            | 17                        | 15                           | 6                        | 3   | 0     | 6                | 47           |
| Distant recurrence +/- other | 42                        | 33                           | 12                       | 5   | 3     | 6                | 101          |
| Any recurrence               | 51                        | 41                           | 14                       | 5   | 3     | 12               | 126          |
| Opposite breast              | 4                         | 2                            | 2                        | 2   | 0     | 0                | 10           |
| Other second primary         | 17                        | 11                           | 10                       | 1   | 5     | 4                | 48           |
| Death                        | 34                        | 21                           | 11                       | 4   | 3     | 7                | 80           |
| Any iDFS event               | 73                        | 55                           | 29                       | 7   | 8     | 17               | 189          |

**Truncated at 5 years**

| Study Arm                    | Taxane & Cyclophosphamide | Anthracycline without Taxane | Anthracycline and Taxane | CMF | Other | No chemo therapy | All patients |
|------------------------------|---------------------------|------------------------------|--------------------------|-----|-------|------------------|--------------|
| Number                       | 589                       | 334                          | 244                      | 52  | 81    | 89               | 1389         |
| IBTR                         | 11                        | 4                            | 1                        | 2   | 0     | 4                | 22           |
| Other LR +/- IBTR            | 16                        | 12                           | 6                        | 3   | 0     | 6                | 43           |
| Distant recurrence +/- other | 35                        | 22                           | 10                       | 5   | 3     | 5                | 80           |
| Any recurrence               | 44                        | 29                           | 13                       | 5   | 3     | 11               | 105          |
| Opposite breast              | 2                         | 1                            | 1                        | 2   | 0     | 0                | 6            |
| Other second primary         | 11                        | 7                            | 7                        | 1   | 3     | 2                | 31           |
| Death                        | 21                        | 10                           | 6                        | 4   | 2     | 6                | 49           |
| Any iDFS event               | 57                        | 36                           | 23                       | 7   | 6     | 14               | 134          |

**eTable 3.** Kaplan-Meier estimates of clinical outcomes at 9 years for patients with a RS 26-100 assigned to chemotherapy stratified by adjuvant chemotherapy regimen in the intention-to-treat population. Nine-year Kaplan Meier estimates (percent), standard error, and 95% confidence intervals shown.

| Study Arm                                                                    | All patients                | Taxane and Cyclophosphamide | Anthracycline without Taxane | Anthracycline and Taxane  | CMF                       | Other                      | No therapy                |
|------------------------------------------------------------------------------|-----------------------------|-----------------------------|------------------------------|---------------------------|---------------------------|----------------------------|---------------------------|
|                                                                              | 1389                        | 589                         | 334                          | 244                       | 52                        | 81                         | 89                        |
| Invasive disease free survival                                               | 75.7 (2.2)<br>(71.1, 79.7)  | 78.6 (3)<br>(72,83.9)       | 73.4 (3.7)<br>(65.3,79.9)    | 77.9 (5.5)<br>(64.7,86.7) | 84 (5.6)<br>(69.3,92.1)   | 66.9 (16.3)<br>(26.9,88.5) | 70.5 (6.6)<br>(55.3,81.4) |
| Freedom from recurrence of breast cancer at a distant site                   | 86.8 (1.7)<br>(83.1, 89.8)  | 88.3 (2.1)<br>(83.6,91.8)   | 82.3 (3.4)<br>(74.4,87.9)    | 92 (2.7)<br>(84.9,95.9)   | 88.5 (4.8)<br>(74.6,95.1) | 95.5 (2.5)<br>(86.8,98.5)  | 89.3 (4.6)<br>(75.9,95.4) |
| Freedom from recurrence of breast cancer at a distant or local-regional site | 84.8 (1.7)<br>(81.1, 87.8)  | 86.6 (2.1)<br>(81.8,90.2)   | 79.5 (3.5)<br>(71.7,85.4)    | 91.6 (2.6)<br>(84.7,95.4) | 88.7 (4.8)<br>(74.9,95.1) | 95.5 (2.5)<br>(86.8,98.5)  | 80.5 (5.5)<br>(66.9,88.9) |
| Overall survival                                                             | 89.3% (1.4)<br>(86.3, 91.7) | 89.3 (2.2)<br>(84.1,92.9)   | 88.3 (2.7)<br>(81.7,92.6)    | 90.9 (2.9)<br>(83.1,95.2) | 90.1 (4.7)<br>(75.8,96.2) | 93.8 (3.8)<br>(80.1,98.2)  | 87.9 (4.5)<br>(75.7,94.2) |

**eFigure 1.** Distribution of followup by arm, including arm D (RS 26-100 assigned to chemoendocrine therapy), arm C (RS 11-25 assigned to chemoendocrine therapy), arm B (RS 11-25 assigned to endocrine therapy alone), and arm A (RS 0-10 assigned to endocrine therapy).

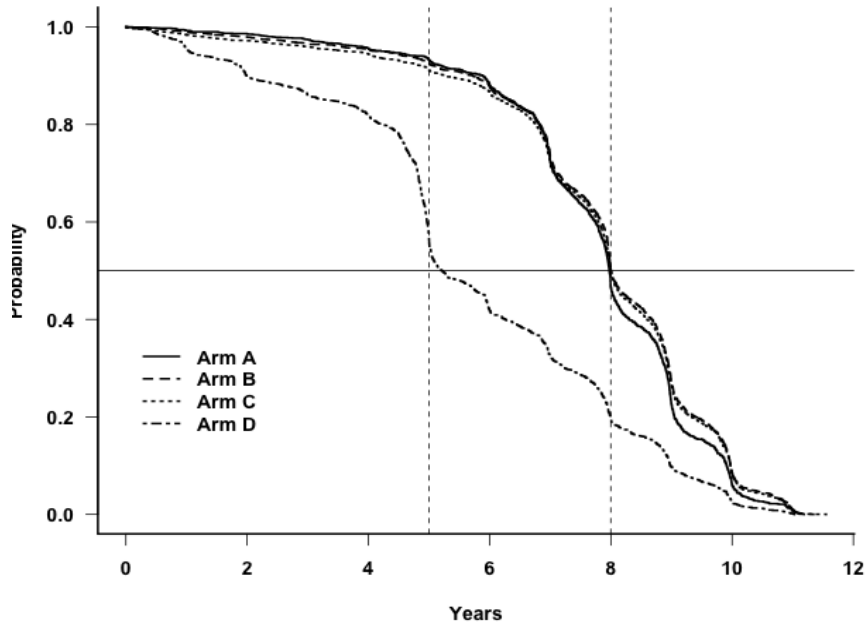

Supplement: jamaoncol-6-367-s002.pdf [file jamaoncol-6-367-s002.pdf]
