# Supplementary material
Source: PubMed Central journal article supplement (PMC6777230)
Supplement: jamaoncol-6-367-s003.pdf [file jamaoncol-6-367-s003.pdf]

## Data Sharing Statement

### Data

**Data available:** Yes

**Data types:** Deidentified participant data

**How to access data:** NCI NCTN/NCORP Data Repository

<https://nctn-data-archive.nci.nih.gov>

**When available:** With publication

### Supporting Documents

**Document types:** None

### Additional Information

**Who can access the data:** Research whose proposed use of the data has been approved

**Types of analyses:** For any purpose

**Mechanisms of data availability:** NCI NCTN/NCORP Data Repository

<https://nctn-data-archive.nci.nih.gov>
